# Supplementary material for: Amelioration of Smoke Taint in Cabernet Sauvignon Wine via Post-Harvest Ozonation of Grapes
Source: MDPI journal article supplement (doi:10.3390/beverages7030044), 2021-07-01
Supplement: s1 [file s1]

## Supplementary Materials

# Amelioration of Smoke Taint in Cabernet Sauvignon Wine via Post-Harvest Ozonation of Grapes

Margherita Modesti <sup>1,2,\*</sup>, Colleen Szeto <sup>2,3</sup>, Renata Ristic <sup>2,3</sup>, WenWen Jiang <sup>4</sup>, Julie Culbert <sup>4</sup>, Cesare Catelli <sup>5</sup>, Fabio Mencarelli <sup>6</sup>, Pietro Tonutti <sup>1</sup> and Kerry Wilkinson <sup>2,3,\*</sup>

<sup>1</sup> Life Sciences Institute, Scuola Superiore Sant'Anna, Piazza Martiri della Libertà 33, 5612 Pisa, Italy; [pietro.tonutti@santannapisa.it](mailto:pietro.tonutti@santannapisa.it)

<sup>2</sup> Department of Wine Science, Waite Research Institute, The University of Adelaide, PMB 1, Glen Osmond, SA 5064, Australia; [colleen.szeto@adelaide.edu.au](mailto:colleen.szeto@adelaide.edu.au) (C.S.); [renata.ristic@adelaide.edu.au](mailto:renata.ristic@adelaide.edu.au) (R.R.)

<sup>3</sup> The Australian Research Council Training Centre for Innovative Wine Production, PMB 1, Glen Osmond, SA 5064, Australia

<sup>4</sup> The Australian Wine Research Institute, P.O. Box 197, Glen Osmond, SA 5064, Australia; [maddy.jiang@awri.com.au](mailto:maddy.jiang@awri.com.au) (W.J.); [julie.culbert@awri.com.au](mailto:julie.culbert@awri.com.au) (J.C.)

<sup>5</sup> P.C. di Pompeo Catelli S.R.L., Via Roma 81, Uggiate Trevano, 22029 Como, Italy; [cesare.catelli@pinco-sa.com](mailto:cesare.catelli@pinco-sa.com)

<sup>6</sup> Department of Agriculture Food and Environment, University of Pisa, Via del Borghetto 80, 56124 Pisa, Italy; [fabio.mencarelli@unipi.it](mailto:fabio.mencarelli@unipi.it)

\* Correspondence: [margherita.modesti@santannapisa.it](mailto:margherita.modesti@santannapisa.it) (M.M.); [kerry.wilkinson@adelaide.edu.au](mailto:kerry.wilkinson@adelaide.edu.au) (K.W.)

**Table S1.** Concentrations ( $\mu\text{g/L}$ ) of volatile phenol glycosides in Cabernet Sauvignon wines made with control and smoke-exposed grapes, with and without post-harvest ozone treatment (1 ppm for 24 h).

|                                    | Control                 | Control + O <sub>3</sub> | Smoke                   | Smoke + O <sub>3</sub>  | <i>p</i> |
|------------------------------------|-------------------------|--------------------------|-------------------------|-------------------------|----------|
| guaiacol glucoside                 | nd                      | nd                       | 10.1 ± 0.5 <sup>a</sup> | 8.1 ± 0.4 <sup>b</sup>  | <0.001   |
| guaiacol glucose-glucoside         | nd                      | nd                       | 1.8 ± 0.2               | 1.6 ± 0.2               | ns       |
| guaiacol pentose-glucoside         | 8.1 ± 0.3 <sup>c</sup>  | 8.5 ± 1.2 <sup>c</sup>   | 286 ± 22 <sup>a</sup>   | 214 ± 14 <sup>b</sup>   | <0.001   |
| guaiacol rutinoside                | 1.7 ± 0.4 <sup>c</sup>  | 1.8 ± 0.4 <sup>c</sup>   | 42 ± 0.6 <sup>a</sup>   | 34 ± 1.8 <sup>b</sup>   | <0.001   |
| 4-methylguaiacol pentose-glucoside | 1.8 ± 0.3 <sup>c</sup>  | 1.2 ± 0.5 <sup>c</sup>   | 43 ± 0.7 <sup>a</sup>   | 33 ± 0.9 <sup>b</sup>   | <0.001   |
| 4-methylguaiacol rutinoside        | 1.1 ± 0.2 <sup>c</sup>  | 1.1 ± 0.3 <sup>c</sup>   | 36 ± 1.9 <sup>a</sup>   | 29 ± 0.5 <sup>b</sup>   | <0.001   |
| phenol glucoside                   | 1.2 ± 0.1 <sup>b</sup>  | 1.4 ± 0.1 <sup>b</sup>   | 27 ± 1.1 <sup>a</sup>   | 26 ± 2.8 <sup>a</sup>   | <0.001   |
| phenol glucose-glucoside           | nd                      | nd                       | 5.7 ± 0.1 <sup>a</sup>  | 4.4 ± 0.1 <sup>b</sup>  | <0.001   |
| phenol pentose-glucoside           | tr                      | tr                       | 22 ± 1.2 <sup>a</sup>   | 18.7 ± 1.4 <sup>b</sup> | <0.001   |
| phenol rutinoside                  | 1.8 ± 0.02 <sup>c</sup> | 2.0 ± 0.4 <sup>c</sup>   | 56 ± 2.3 <sup>a</sup>   | 49 ± 2.0 <sup>b</sup>   | <0.001   |
| cresol pentose-glucoside           | tr                      | tr                       | 15.2 ± 0.7 <sup>a</sup> | 13.3 ± 0.8 <sup>b</sup> | <0.001   |
| cresol rutinoside                  | 4.3 ± 0.06 <sup>c</sup> | 4.3 ± 0.8 <sup>c</sup>   | 102 ± 5.0 <sup>a</sup>  | 87 ± 2.6 <sup>b</sup>   | <0.001   |
| syringol glucoside                 | nd                      | nd                       | 16.6 ± 1.0 <sup>a</sup> | 13.0 ± 1.0 <sup>b</sup> | <0.001   |
| syringol glucose-glucoside         | 9.9 ± 0.4 <sup>c</sup>  | 10.8 ± 0.3 <sup>c</sup>  | 497 ± 5.9 <sup>a</sup>  | 383 ± 11 <sup>b</sup>   | <0.001   |
| syringol pentose-glucoside         | 2.3 ± 0.3 <sup>c</sup>  | 2.6 ± 0.2 <sup>c</sup>   | 100 ± 5.9 <sup>a</sup>  | 77 ± 3.1 <sup>b</sup>   | <0.001   |
| 4-methylsyringol glucose-glucoside | nd                      | nd                       | 28 ± 1.0 <sup>a</sup>   | 19.1 ± 0.3 <sup>b</sup> | <0.001   |
| 4-methylsyringol pentose-glucoside | nd                      | nd                       | 9.8 ± 0.7 <sup>a</sup>  | 7.0 ± 0.5 <sup>b</sup>  | <0.001   |

Data are means from three replicates ( $n = 3$ ) ± standard deviation, measured as syringol glucose-glucoside equivalents; nd = not detected ( $<0.5 \mu\text{g/L}$ ); tr = trace ( $0.5\text{--}1 \mu\text{g/L}$ ). Different letters (within rows) indicate statistical significance ( $p = 0.05$ , one-way ANOVA); ns = not significant.

**Table S2.** Mean intensity ratings for sensory attributes of Cabernet Sauvignon wines made with control and smoke-exposed grapes, with and without post-harvest ozone treatment (1 ppm for 24 h).

| Attribute           | Control          | Control + O <sub>3</sub> | Smoke            | Smoke + O <sub>3</sub> | <i>p</i> |
|---------------------|------------------|--------------------------|------------------|------------------------|----------|
| fruit aroma         | 4.2 <sup>a</sup> | 4.0 <sup>a</sup>         | 2.2 <sup>b</sup> | 2.3 <sup>b</sup>       | <0.0001  |
| smoke aroma         | 1.8 <sup>b</sup> | 1.4 <sup>b</sup>         | 6.2 <sup>a</sup> | 5.4 <sup>a</sup>       | <0.0001  |
| cold ash aroma      | 1.7 <sup>b</sup> | 1.4 <sup>b</sup>         | 5.2 <sup>a</sup> | 4.5 <sup>a</sup>       | <0.0001  |
| earthy aroma        | 2.8              | 2.4                      | 3.0              | 3.0                    | ns       |
| medicinal aroma     | 2.0 <sup>b</sup> | 2.3 <sup>b</sup>         | 3.9 <sup>a</sup> | 3.6 <sup>a</sup>       | <0.0001  |
| burnt rubber aroma  | 1.5 <sup>b</sup> | 1.2 <sup>b</sup>         | 3.4 <sup>a</sup> | 3.1 <sup>a</sup>       | <0.0001  |
| fruit flavor        | 4.6 <sup>a</sup> | 4.5 <sup>a</sup>         | 2.6 <sup>b</sup> | 3.0 <sup>b</sup>       | <0.0001  |
| smoky flavor        | 1.6 <sup>b</sup> | 1.2 <sup>b</sup>         | 5.9 <sup>a</sup> | 5.1 <sup>a</sup>       | <0.0001  |
| medicinal flavor    | 1.8 <sup>b</sup> | 1.7 <sup>b</sup>         | 3.9 <sup>a</sup> | 3.4 <sup>a</sup>       | <0.0001  |
| ashy aftertaste     | 1.4 <sup>b</sup> | 1.3 <sup>b</sup>         | 3.1 <sup>a</sup> | 3.1 <sup>a</sup>       | <0.0001  |
| woody aftertaste    | 2.4 <sup>b</sup> | 2.3 <sup>b</sup>         | 3.1 <sup>a</sup> | 3.1 <sup>a</sup>       | 0.001    |
| metallic aftertaste | 2.0 <sup>b</sup> | 1.9 <sup>b</sup>         | 3.0 <sup>a</sup> | 2.8 <sup>a</sup>       | <0.0001  |
| drying aftertaste   | 4.4              | 3.9                      | 4.5              | 4.3                    | ns       |
| bitterness          | 2.2 <sup>b</sup> | 2.0 <sup>b</sup>         | 3.1 <sup>a</sup> | 2.8 <sup>a</sup>       | <0.0001  |
| acidity             | 5.6              | 5.1                      | 5.5              | 5.3                    | ns       |
| hotness             | 3.3              | 3.2                      | 4.0              | 4.0                    | ns       |
| astringency         | 4.0              | 3.9                      | 4.0              | 4.0                    | ns       |
| body                | 3.9              | 3.5                      | 3.6              | 3.6                    | ns       |

Data are mean ratings for three wine replicates, each evaluated by 15 judges. Different letters (within rows) indicate statistical significance ( $p = 0.05$ , two-way ANOVA); ns = not significant.
